# Supplementary material for: Metagenomes from Coastal Marine Sediments Give Insights into the Ecological Role and Cellular Features of Loki- and Thorarchaeota
Source: PubMed Central journal article supplement (PMC6737245; doi:10.1128/mbio.02039-19), 2019-09-10
Supplement: mBio.02039-19-sf001.pdf [file mBio.02039-19-sf001.pdf]

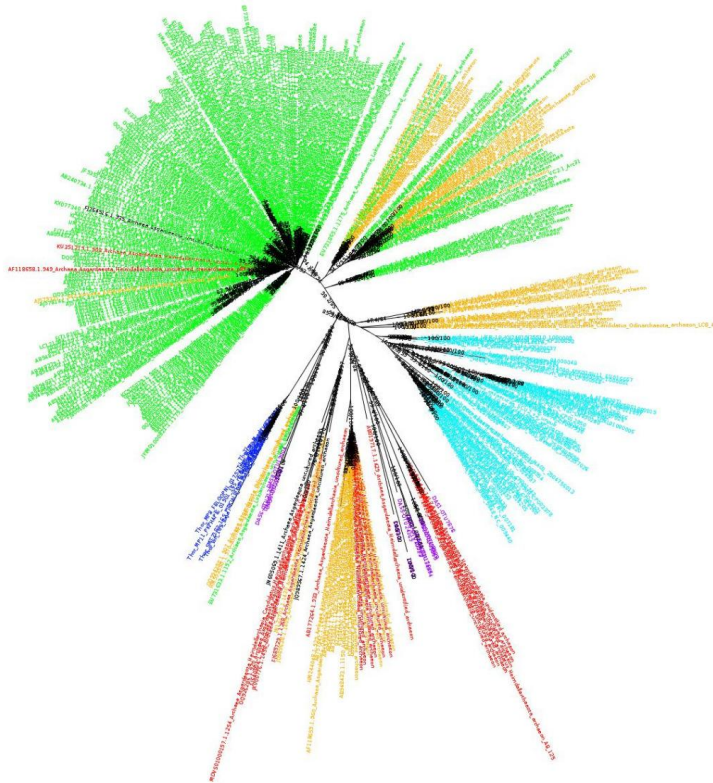

- Lokiarchaea
- Thorarchaea
- Odinararchaea
- Heimdallarchaea
- DAS
- Unknown Asgard
  
- TACK
