# Supplementary material for: Metagenomes from Coastal Marine Sediments Give Insights into the Ecological Role and Cellular Features of Loki- and Thorarchaeota
Source: PubMed Central journal article supplement (PMC6737245; doi:10.1128/mbio.02039-19), 2019-09-10

Tree scale: 0.1

Colored ranges

Odin

Heim

DAS

Thor

Loki-A

Loki-B1

Loki-B2

Loki-C

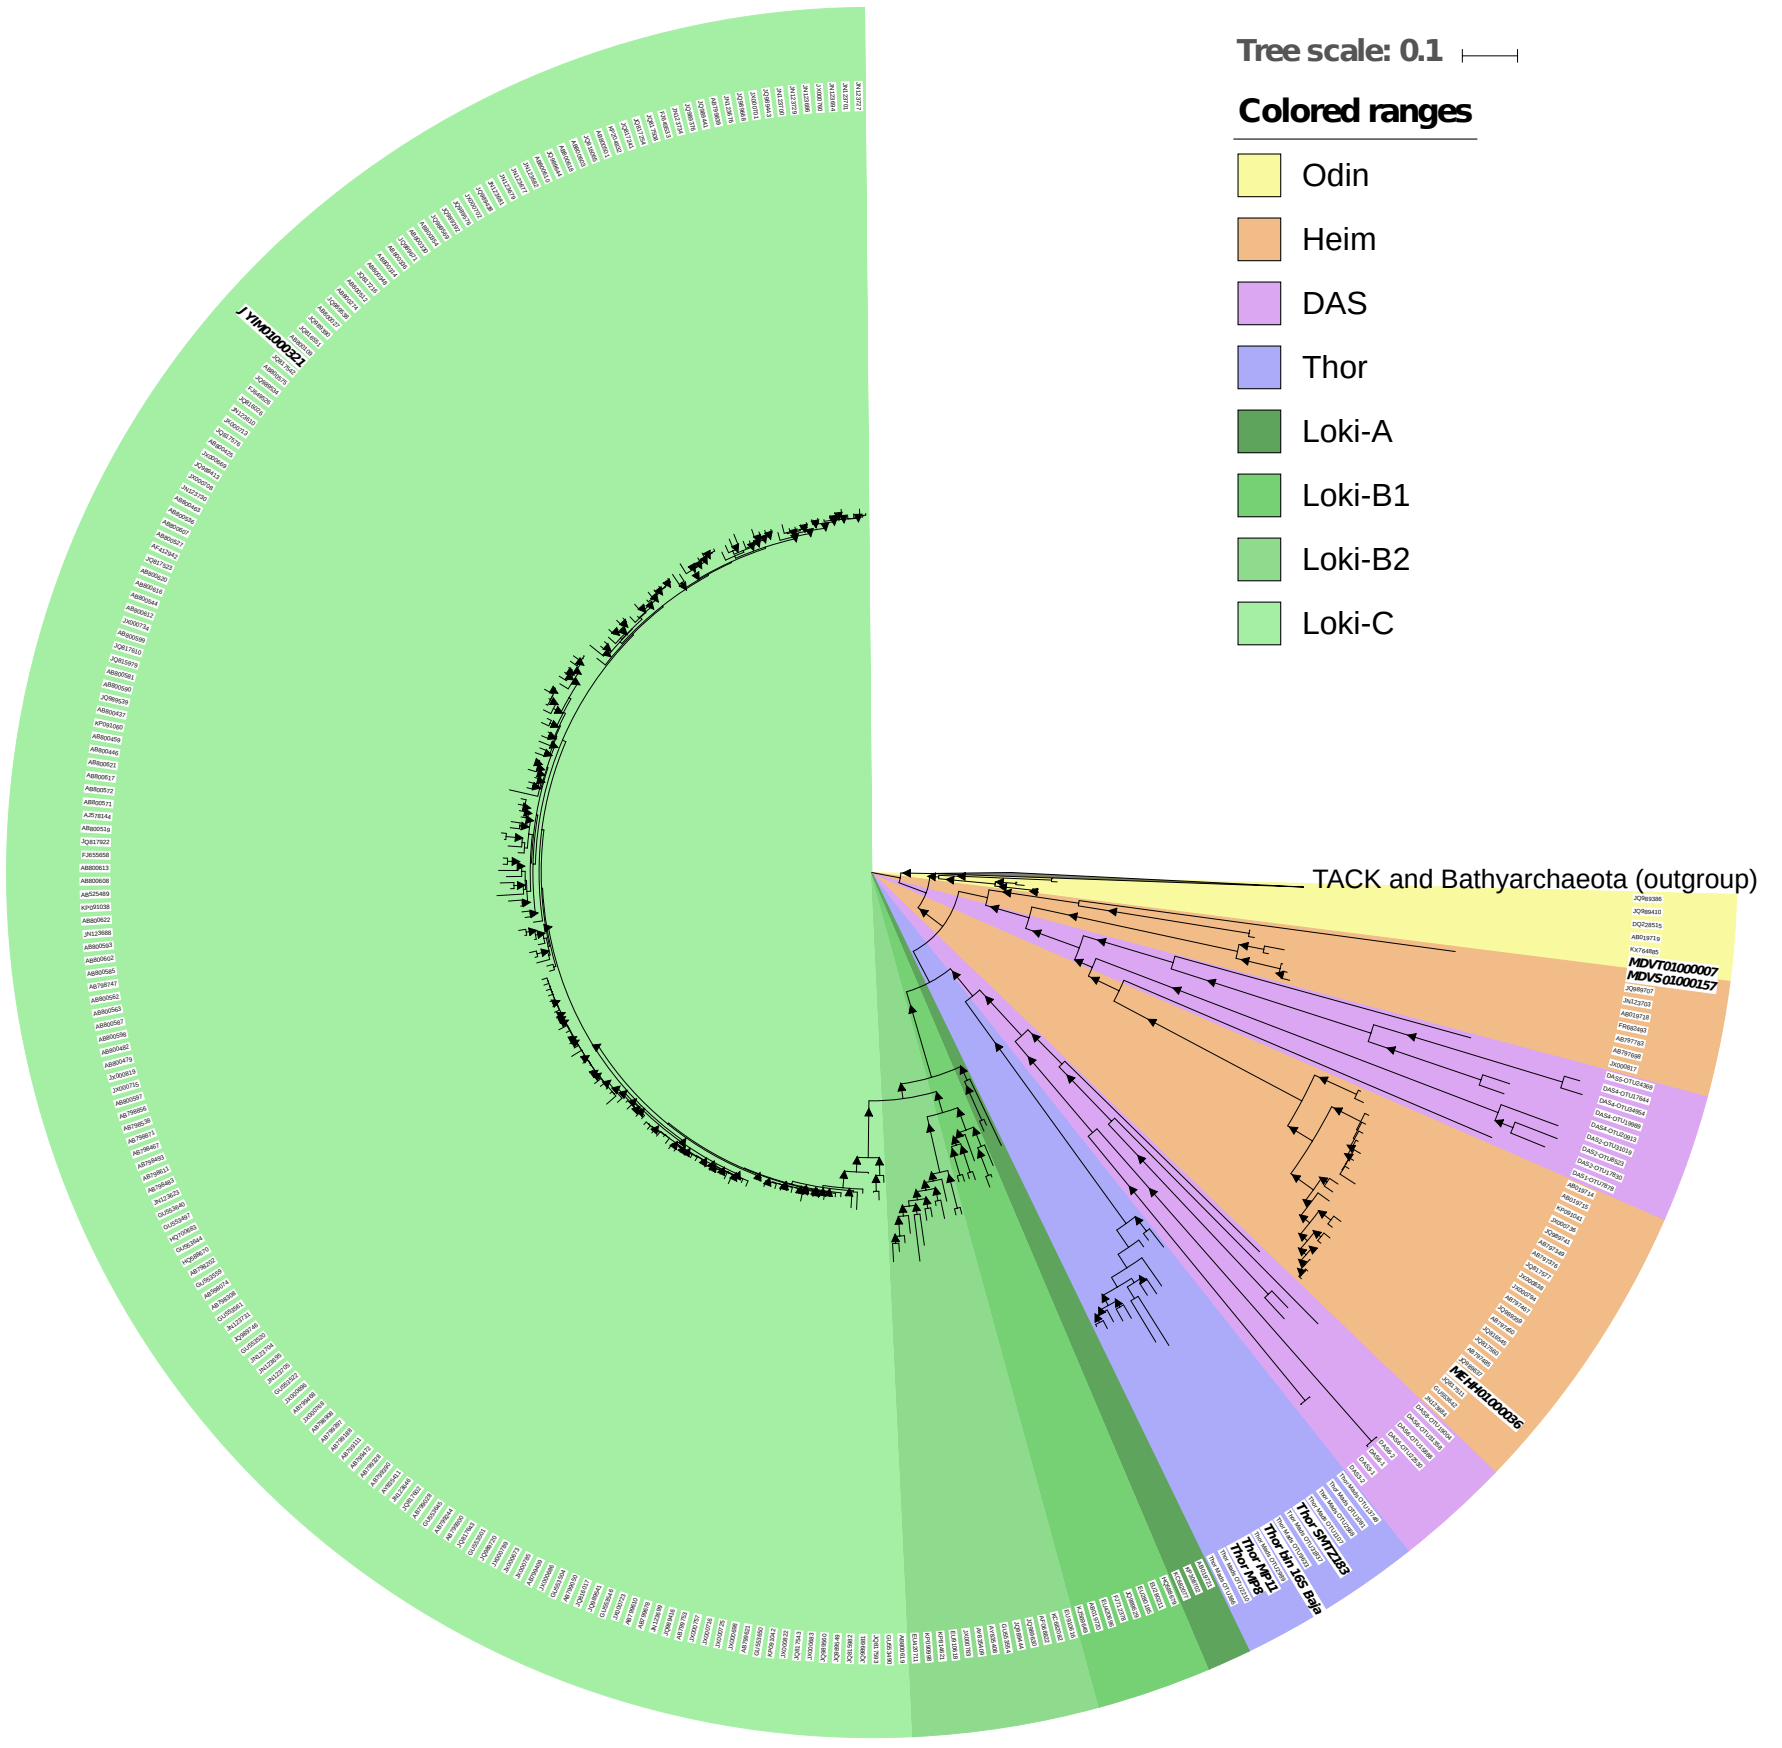

Supplement: mBio.02039-19-sf002.pdf [file mBio.02039-19-sf002.pdf]
