# Supplementary material for: Metagenomes from Coastal Marine Sediments Give Insights into the Ecological Role and Cellular Features of Loki- and Thorarchaeota
Source: PubMed Central journal article supplement (PMC6737245; doi:10.1128/mbio.02039-19), 2019-09-10
Supplement: mBio.02039-19-sf003.pdf [file mBio.02039-19-sf003.pdf]

Epoxyqueosine reductase  
(QueG, K18979)

Archaeal  
4Fe-4S

Bacterial 4Fe-4S and  
reductive dehalogenases

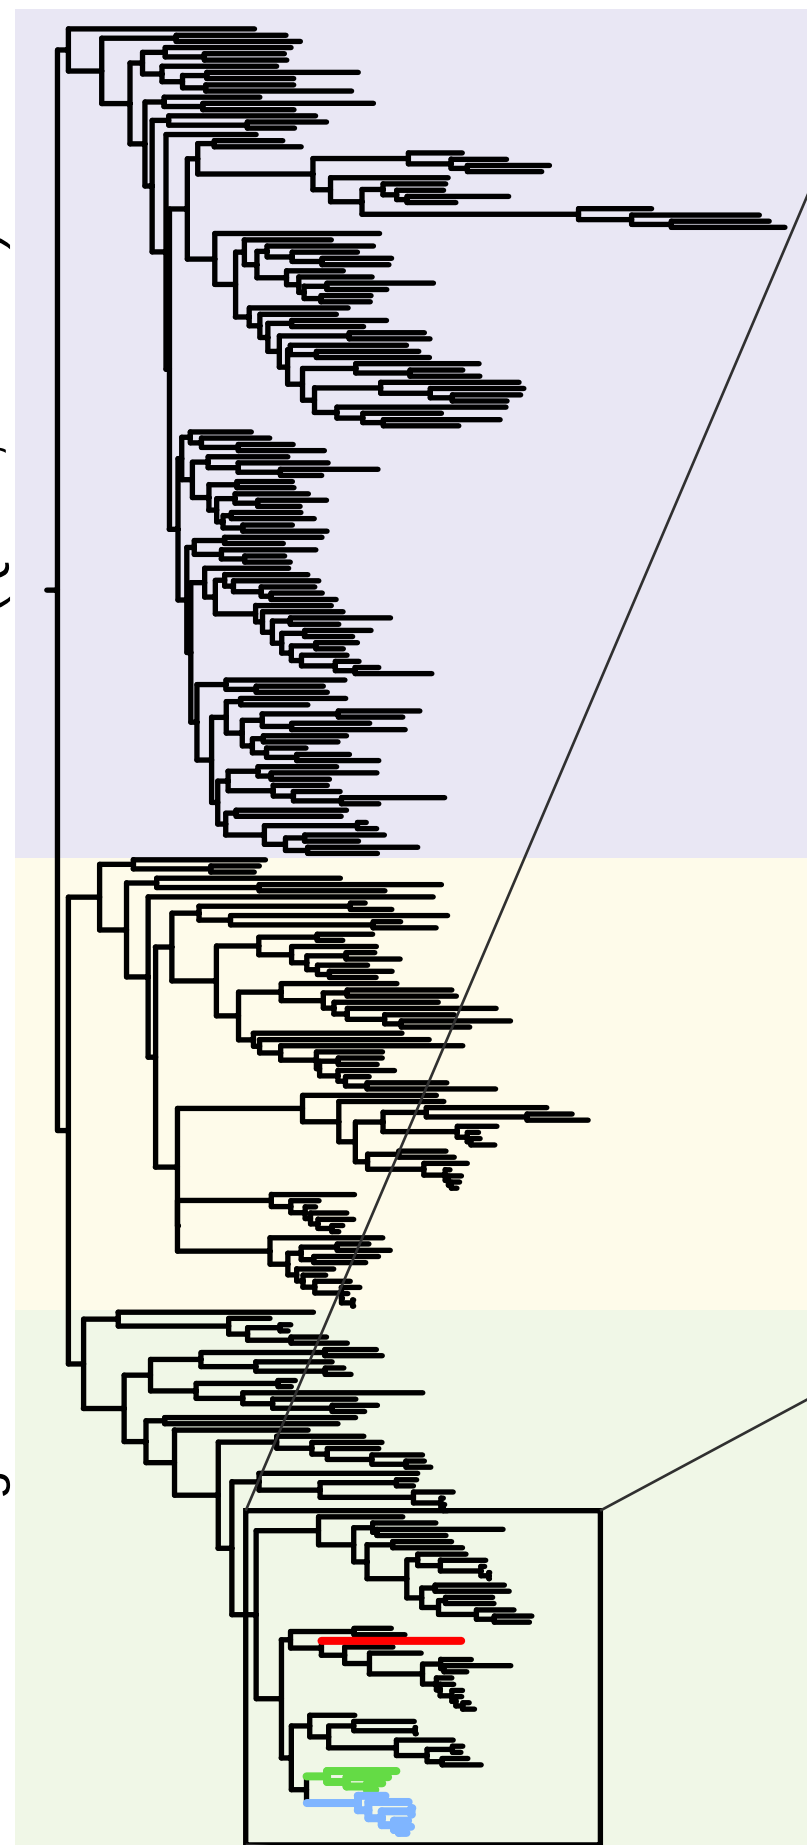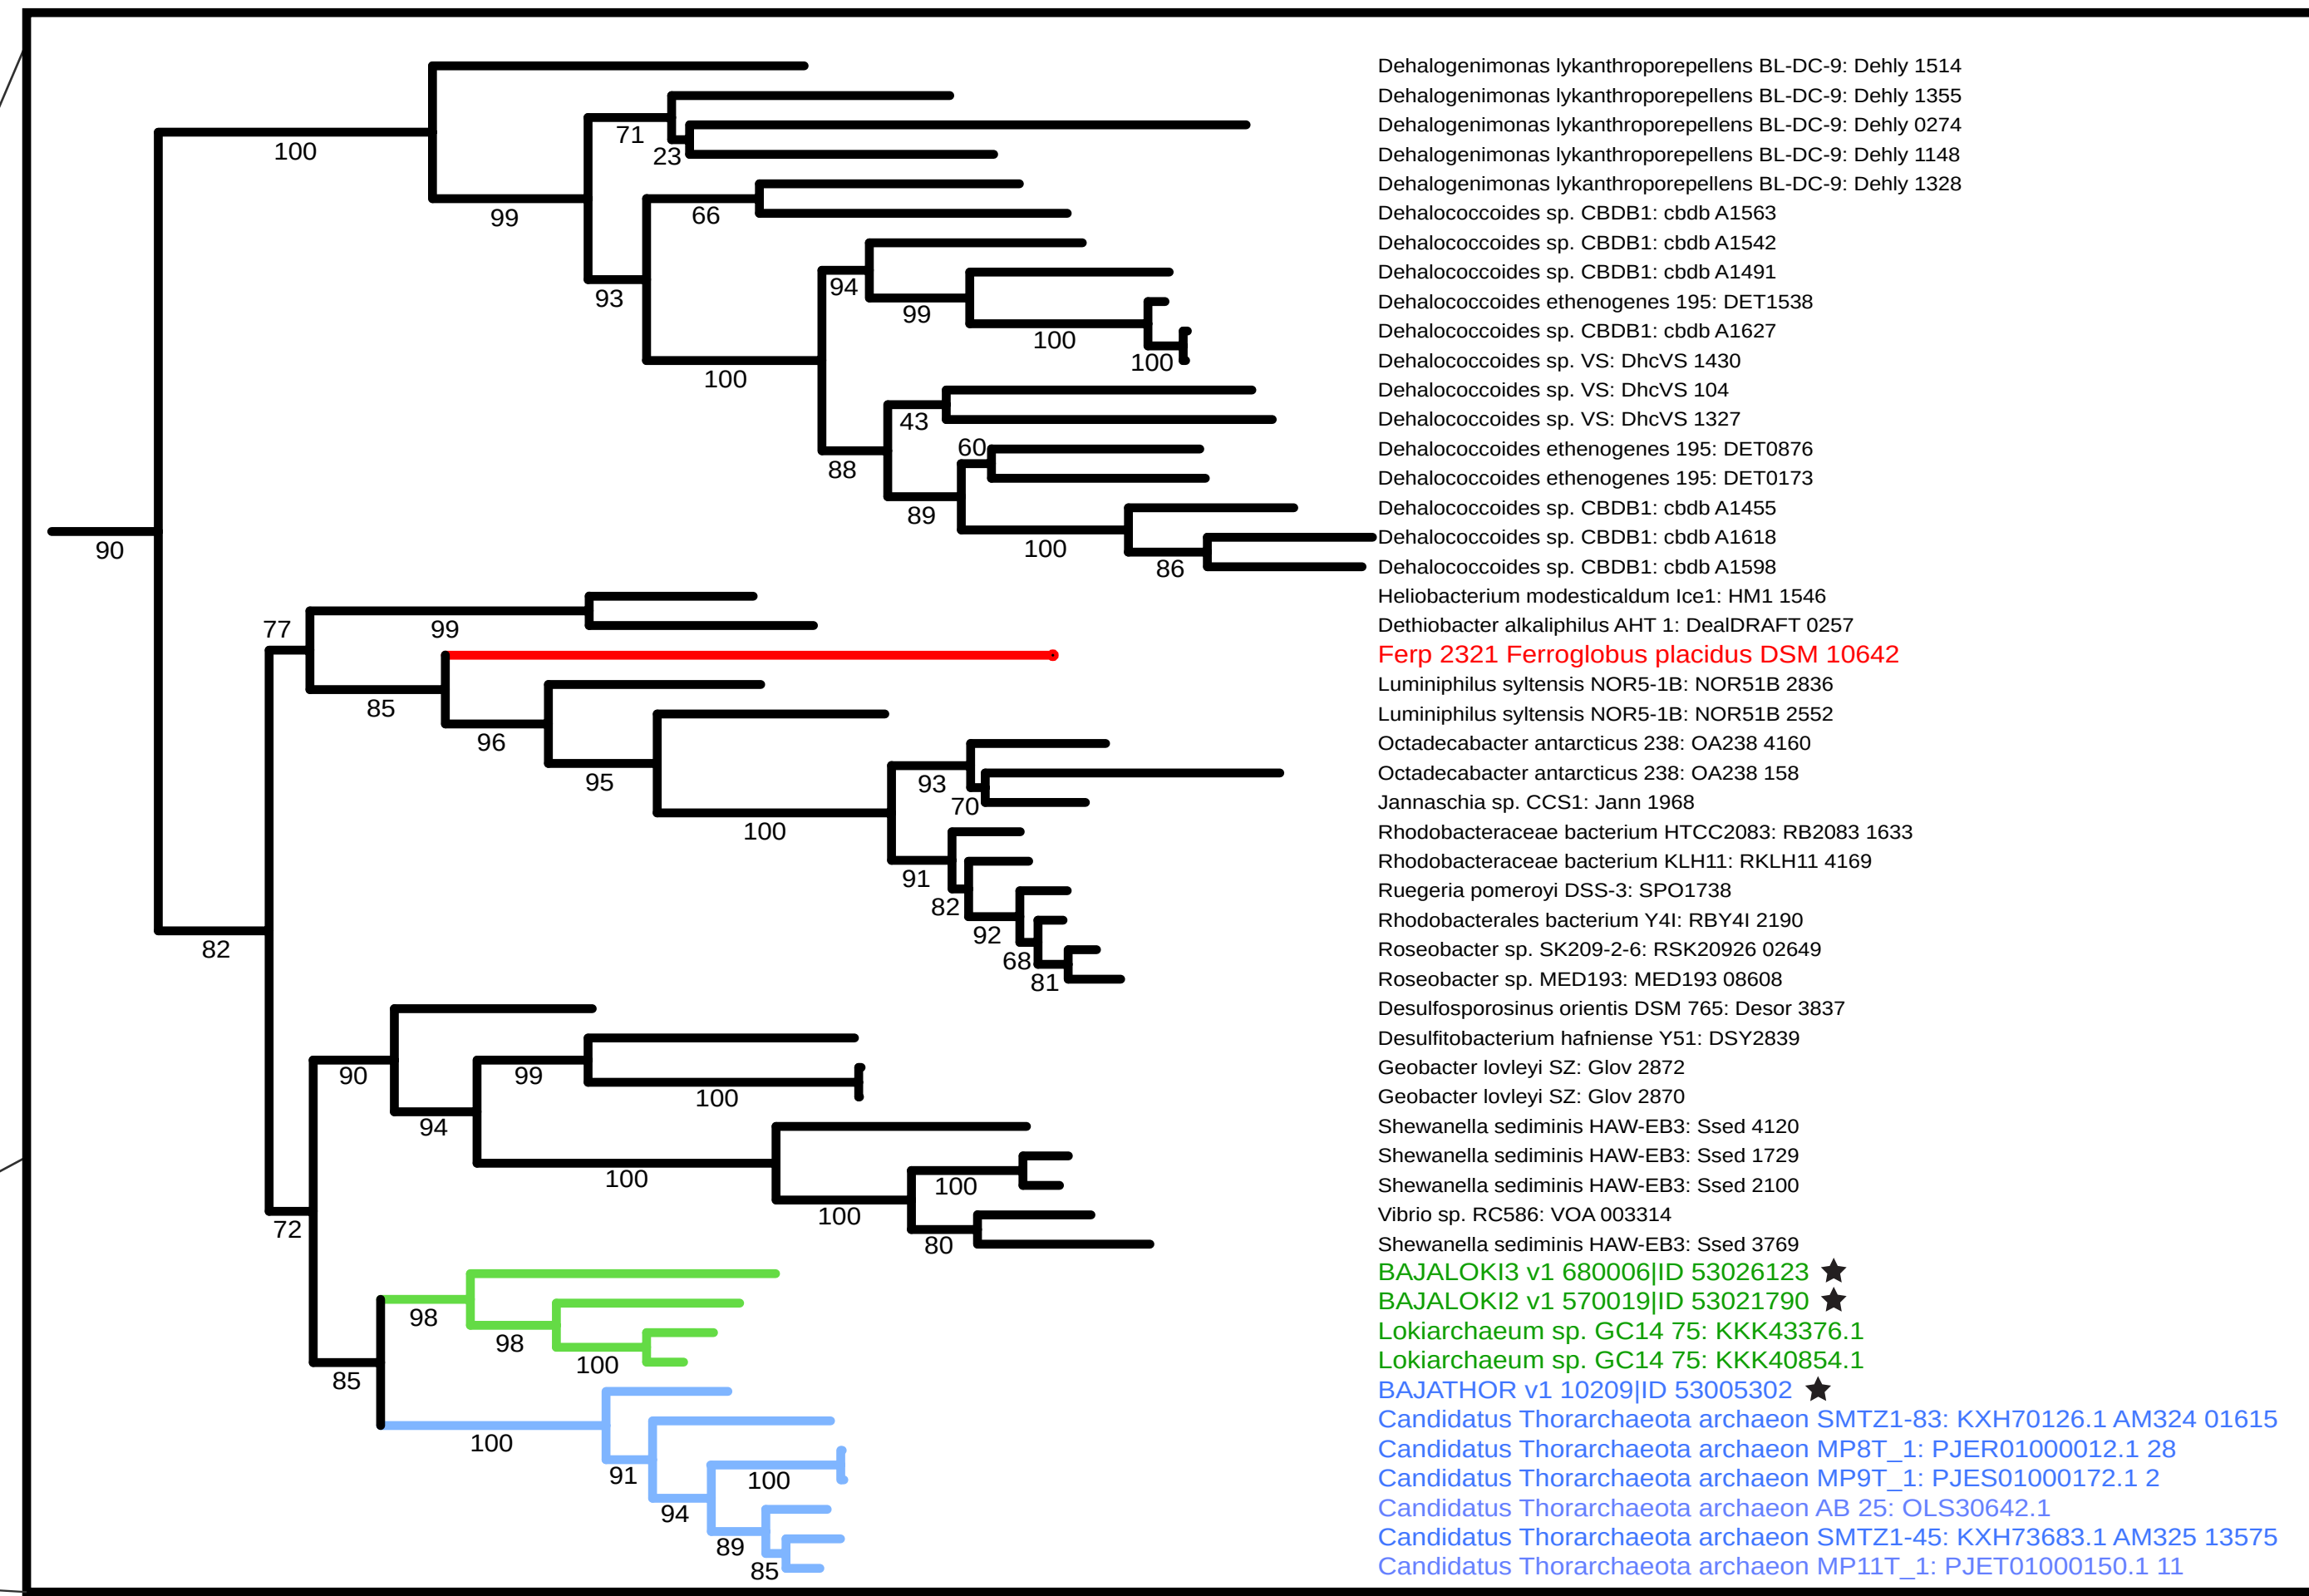

● Putative RDase from Ferroglobus

● Putative RDase from Lokiarchaeota

★ Genomes from this study

● Putative RDase from Thorarchaeota
