# Supplementary material for: Metagenomes from Coastal Marine Sediments Give Insights into the Ecological Role and Cellular Features of Loki- and Thorarchaeota
Source: PubMed Central journal article supplement (PMC6737245; doi:10.1128/mbio.02039-19), 2019-09-10
Supplement: mBio.02039-19-sf004.pdf [file mBio.02039-19-sf004.pdf]

RR Sec. signal

vcrA\_Dmc\_Q69GM4 1 ---MSKFHKTISRDFMKGLGLAGAGIGA-----VAASAPV-FHDIDE
tceA\_Dmc\_Q9KIP5 1 -M-----SEKYHSTVTRRDFMKRLGLAGAGAGALGAAVLAENNLPHFHKDVEDD
bvcA\_Dmc\_Q5YD55 1 -----MHNHCTISRDFMKGLGLAGAGIGA-----ATSVMPN-FHDLDE
cprA\_Ddh\_Q9XD04 1 -----MENNEQRQQTGMNRRSFLKVG-----AATTMGVIGAIKA--PAKVAN
prdA\_Dsp\_Q3LHG0 1 -MDREKENT-LDQKEEKRSVGISRRNFFKASGIAAGVAALG----LVTKSQPV-YAQQES
rdhA\_Dha\_B8FVX4 1 -M-----KMNLDRRSFLKASLVSAVAASAAAASAAKETFAPL-TAEAAE
pceA\_Dha\_Q8GJ31 1 -M-----GEINRRNFKLVSVILGAAAAVASASAVKGMVSP-L-VADAAD
cprA\_Dch\_Q8RQC9 1 -MTRSGKMEKLLKNEESKALSINRRNFKLIG-----AATTAMGLIGAVKSS-SQVAAA
cprA\_Dha\_P81594 1 -----MENNQRQSGMSRRSFLKVG-----AATTMGVIGAIKA--PAKVAN
pceA\_Smu\_W6EQP0 1 -M-----EKKKPELSRRDFGKLIIGGAAVTIAPFG-VPGANAAEKEKNAAE
Rdh\_Fer\_p1 1 -----WENHPL
Thor\_SMTZ145 1 -MYVKTDLG-DSSKCTIECLGACQQ-----IHGDDSP-LSIQE-N
Thor\_MP11T 1 -MYVKSNLG-DSSKCFECLYACQR-----IHGEDPPL-SIQQDN
Thor\_AB 61 LMFVRTDTG-DPSSCNHECLDACRR-----VHGDESP-LSFQEGP
Thor\_SMTZ183 1 -MQVLEDLG-KPDKCDRECVEACIQ-----QHGRNAPL-RFADGD
Thor\_MP8T 1 -MYISKTLC-NPQVCKYECRTACSQ-----IHGDDSP-LGFGKES
Thor\_MP9T 1 -MYISKTLC-NPQVCKYECRTACSQ-----IHGDDSP-LGFGKES
Thor\_Baja 1 -VIIDKDLG-DPRKCNQACVVACQR-----IHGENAPL-IYTQGA
Loki\_Baja2 1 -MNKNQN-
Loki\_GC14\_1 1 -M-
Loki\_GC14\_2 1 -M-
Loki\_Baja3 1 -MKKASDI-
consensus 61 m i rr f k g lkg pl a

cluster (Thor 3)

vcrA\_Dmc\_Q69GM4 300 LNKRTGGI--AGAGSYTVYKDFARVGTLVQMFIKYLYGHALY--WPIGWG-PGGCFTTF
tceA\_Dmc\_Q9KIP5 335 RFKYAHSI--PMDPCSCIAYPLFTEVEARIQOFIAGLGYNSMG--GVEAWGPGSAFGNL
bvcA\_Dmc\_Q5YD55 306 RFKRSLGW--SLDASSMIAYPQMAFNNGRRVQTFLLKALGYOGLG--GDVAMWGPAGFVGM
cprA\_Ddh\_Q9XD04 225 TMWASTGYDGISGAMSMQSYFTSGCIAVIMAKYIRTLGYNARXHHAKNYEA-IMPVCIMA
prdA\_Dsp\_Q3LHG0 244 MLKYAPTT--LSEATVGTTEYSQMAESAGKMAEFIRGLGYNALP--MGNDAS-LSVPIAID
rdhA\_Dha\_B8FVX4 320 AYRTAPSV--LQGAAPGKSYSNMGEVAYKVASFLREIYGNVAVP--SGNDTG-MSVPIAVQ
pceA\_Dha\_Q8GJ31 320 AIRTSPSV--ISSATVGSYSNMAEYAVIAVFLRKLGYAAP--CGNDTG-ISVPMVAVQ
cprA\_Dch\_Q8RQC9 236 TTLASTGYDGISGAMSFQSYHATGNIAVILAQYIRTLGYNARAHHAKNYEA-IMPVAVIA
cprA\_Dha\_P81594 225 TMWASTGYDGISGAMSMQSYFTSGCIAVILAKYIRTLGYNARAHHAKNYEA-IMPVCIMA
pceA\_Smu\_W6EQP0 266 MMQTAPNS--MACATTAFQYSRMCMFDMWLQCFIRYMGYYAIP--SCNGVG-QSVAFAVE
Rdh\_Fer\_p1 87 M-----QGDIAGFYSKMAIIVAGSLAEFLRALGFTA-----PYAIS
Thor\_SMTZ145 236 AIATSPSF--TSSAATALGYSTMAFVELELAAFIQRLLGYNAMS--CGNNDV-LSVPIAID
Thor\_MP11T 237 AIATSPTF--TSSAATALGYSTMAFVELELAAFIQRLLGYNAIT--CGNDVS-LSVPIAID
Thor\_AB 299 AIATSPAF--ASSAAVGFGYSMAFVEIELELAAFIQRLLGYRAMT--SGNDVS-LSVPIAID
Thor\_SMTZ183 239 GISTSPAF--PSALSTAVGYSKMAFVEIELELAAFIRRLGFRVAVP--CGNDIA-LSVPLAID
Thor\_MP8T 238 AIATSPTF--TSSAATGLGYSKMAFIEAELASFIRRMGYNAMT--CGNEVG-LSVPLAID
Thor\_MP9T 238 AIATSPTF--TSSAATGLGYSKMAFIEAELASFIRRMGYNAMT--CGNEVG-LSVPLAID
Thor\_Baja 233 GLAASPAP--AAQAASSIGYSKMAFVEIQLSSLIIRRMGYHALA--CGNDVA-LSVPLAID
Loki\_Baja2 191 AISTAPAQ--QAAAAASLAYSMAFVTSCLGFEFIRNMGYKALQ--CGNDTG-LSIPLAID
Loki\_GC14\_1 181 AISTAPAQ--PAAAAASLAYSMAFVTSCLGFEFIRNMGYRALQ--CGNDTA-LSIPLAID
Loki\_GC14\_2 181 SISTAPAQ--PAAAAASLAYSMAFVTSCLGFEFIRNMGYRALQ--CGNDTA-LSIPLAID
Loki\_Baja3 176 GINCAPTF--LEFASAGLGYSKMSTIACMAQFIRNMGYRALP--CANDTA-LSIPLAID
consensus 541 ai tspgw sgaasgigYskmaf v la fir lGynal cgndmg lsvpiaid

vcrA\_Dmc\_Q69GM4 410 CVSGGVHOEDEPTWDS--GNWNVQGYLGYRTDWSGCH-----NOCGMCQSSCPF
tceA\_Dmc\_Q9KIP5 447 CPTQAI SHE-GPRYDS--PHWDCVSGYEGWHLDYHKC-----INCTICEAVCPF
bvcA\_Dmc\_Q5YD55 418 CPSNAIQVG-PPQWNS--NRWDNTPGYLGYRLNWGR-----VLCTNCETYCPF
cprA\_Ddh\_Q9XD04 340 CPNDAITFDEDEPIE-----YNGYLRWNSDFKKTERTTNEEGSSCGTCLKVCWPW
prdA\_Dsp\_Q3LHG0 354 CPSESIKSKDPPSDKV--ACASNNPMMKKWYVNTWTCLNQVWENG--GGCNI CLSACPY
rdhA\_Dha\_B8FVX4 430 CPAQAISHVKDPVWLQPEDCTPSENPYTEKWQFDSQRCLSFAYNG--GDCGSCI AVCSW
pceA\_Dha\_Q8GJ31 430 CPAQAISHKEDKVLQPEDCEVAENPYTEKWHLDSNRCSFAYNG--SPCSNCAVCSW
cprA\_Dch\_Q8RQC9 351 CPGEAITDRDHVE-----YNGYLRWNSDMKKCAVFRRTTNEEGSSCGRCMKVCPW
cprA\_Dha\_P81594 340 CPNEAISFDEDEPIE-----YNGYLRWNSDFRKTERTTNEEGSSCGTCMKVCPW
pceA\_Smu\_W6EQP0 376 CPSKAITEG-PRTEEG--RSIHNSGKLOWQNDYKCLGYWPESG--GYCGVAVVAVCPF
Rdh\_Fer\_p1 176 CPAKAIP--PSWK-----YKWHVDVEKC-EYWCKSG--NLGCVVVRVCPY
Thor\_SMTZ145 349 CPSQSI PYGKEQTWSG--NSPSNNPGIKKWIYINVERCYGFWDNG--SECSNCIRSCPY
Thor\_MP11T 350 CPSQSI PYGKEQSWSG--NSISNNPMMKKWYVNVDSYGFWDNG--SECSNCIRSCPY
Thor\_AB 412 CPSQSI PYGKEQTWEG--TTISNNPGIKKWIYVEVESYGFWDNG--SDCSNCIRSCPY
Thor\_SMTZ183 352 CPSQSI PSGLTRTWAG--ATRSNNPGIKKWIYVNPETCYGFWDNG--SDCSNCIRSCPY
Thor\_MP8T 351 CPSKSI PFGKERTLKG--KTI SNNSGIKKWIYVNVETCYGFWDNG--SECSNCIRSCPY
Thor\_MP9T 351 CPSKSI PFGKERTLKG--KTI SNNSGIKKWIYVNVETCYGFWDNG--SECSNCIRSCPY
Thor\_Baja 346 CPSQSI PYDKEQSWKG--TSKSNNPGVKKWIYVDVESYGFWDNG--GECSCNCIRSCPY
Loki\_Baja2 304 CEVNAIPEEKNPTWNR--QSI SNNSEALKYIYVNVKCFEWFVENS--SDCGKCI AACPF
Loki\_GC14\_1 294 CETKAITEEREPSFKG--KNI SNNSGIKKWIYINAEKCFEWFVENS--SDCGKCI AACPF
Loki\_GC14\_2 294 CETNAISKEVQPSFKG--NNI SNNSGIKKWIYTDAAEKCFEWFVENS--SDCGSCI ATCPF
Loki\_Baja3 289 CDFGAI SNNDSPTYQP--YSKSNNSGTKKWIYVDVEKCYDGVVHYS--SDCAKCIKACPF
consensus 661 Cpsqaip ekeptw g tvsnnpgmkkwyvdvekCy fvweng sdcgnCiksCpy

cluster 2

vcrA\_Dmc\_Q69GM4 40 LVSSEANS-----TKDQPWYVKH
tceA\_Dmc\_Q9KIP5 48 LLSAGKAL-----EGDHANKVNNHPWVVT
bvcA\_Dmc\_Q5YD55 40 VISAASAET-----SSLSGKSLNNFPWYVKE
cprA\_Ddh\_Q9XD04 42 AAETMNYV-----PGPTNARSKLRPVH--
prdA\_Dsp\_Q3LHG0 54 ESAIVNF-----AVQEVDSQPYNLP-
rdhA\_Dha\_B8FVX4 43 IIAPIRE-----TAEFPYQV--
pceA\_Dha\_Q8GJ31 42 IVAPITE-----TSEFPYKV--
cprA\_Dch\_Q8RQC9 52 ATDTLNYV-----PGRKSQNSKLRPHEH--
cprA\_Dha\_P81594 42 AAETLNYV-----PGSGKIRSKLRPVH--
pceA\_Smu\_W6EQP0 47 IRQQFAM-----TAGSPIIV--
Rdh\_Fer\_p1 7
Thor\_SMTZ145 37 RYPIINLEKCTRCLACVRDCPLGAIVIN-----QMPHKA-QLSEIGVNKTTYCYPYDV--
Thor\_MP11T 38 SQPKINHETCTKCLSCIRECPLEAIIIE-----ERQVEDS-KPSRMRTFRMTGYFPYQV--
Thor\_AB 99 DHPVINLETCTVCLACVRVCLDAIKAE-----RATTEGPIDAVEASAFHVSDYVPYEV--
Thor\_SMTZ183 38 RFPTIENG-CTICLACVRECPYGAITSSFADGHLKRRNV-GARGHRRPRIM-LRPYEA--
Thor\_MP8T 38 LYPVIDEGTCTECLACVRACPLNAISIS-----EHPDTFFPEPIPPPVPAPISSERPYEV--
Thor\_MP9T 38 LYPVIDEGTCTECLACVRACPLNAISIS-----EHPDTFFPEPIPPPVPAPISSERPYEV--
Thor\_Baja 38 HALTYNLGRCTECLSLRACTKGAITAS-----KISTKKT-SASSEHDSLS-IHPYEV--
Loki\_Baja2 7
Loki\_GC14\_1 2
Loki\_GC14\_2 2
Loki\_Baja3 8
consensus 121 m t py v

cluster (Thor 4)

vcrA\_Dmc\_Q69GM4 354 DGQGEQGRTG-AAIHWKFGSSQRGSERVITDLPPIAETPP--IDAGMFEFCKTCYICRDV
tceA\_Dmc\_Q9KIP5 391 SGLGEQSRVS-SIIEPRYGSNTKGSRLMLTDLPLAETKP--IDAGIREFCKTCGICAEH
bvcA\_Dmc\_Q5YD55 362 SGLSEQCRAA-NEISPKYGSATKGSNRLVCDLPMVETKP--IDAGIHKFCETCGICTTV
cprA\_Ddh\_Q9XD04 284 AGLGELSRGTDCAIHPRRLGYRHKVA-AVTDLPLAPDKP--IDFGLLDFCRVCKKCADN
prdA\_Dsp\_Q3LHG0 299 AGLGELGRHG-LLVHPEYGSVSRIS-KVLTDLPLAPDKP--ISFGAAEF CRTCMKCAEA
rdhA\_Dha\_B8FVX4 375 AGLGEAGRSQ-QLITQKYGPRVRIA-KVYTDLELVPDKP--INIGAREFCRLCLKCADV
pceA\_Dha\_Q8GJ31 375 AGLGEAGRNG-LLITQKFGPRHRIA-KVYTDLELAPDKP--RKFQVREFCRLCKKCADA
cprA\_Dch\_Q8RQC9 295 AGLGELSRGTGSTIHPRMGFRHVA-AVTDLPLAPDKP--IDFGLQDFCRICGKCAEN
cprA\_Dha\_P81594 284 AGLGELSRGTGDSATHPRLGFRHVA-AVTDLPLAPDQP--LDFGLLDFCRVCKKCADN
pceA\_Smu\_W6EQP0 321 AGLGQASRMG-ACITPEFGPNVRLT-KVFTNMPVLPDKP--IDFGVTEFCETCKKCAEA
Rdh\_Fer\_p1 122 AGLGEYSRMG-LLITKKGPRVRL--KVFTDTPKADKP--VRFQVYEFCLCKKCAEK
Thor\_SMTZ145 291 AGLGQYGRHG-LLITKQYGRVRIA-KVLTDMPLLRDYPDENFCKAVVRFCECTCKKCAT
Thor\_MP11T 292 AGLGQYGRHG-LLITKQYGRVRIA-KVLTNMPLLRDYPDENFCKAVVRFCECTCKKCAT
Thor\_AB 354 AGLGQYGRHG-LLITKEFGPRVRIA-KVLTDMPLQRDYPDEGFCCKSVIRFCETCEKCAAT
Thor\_SMTZ183 294 AGLGQYGRHG-LLITKEYGPRVRIA-KVLTDMPLLPDCEPTGFCFAVLRFCETCEKCAHH
Thor\_MP8T 293 AGLGQYGRHG-LLISKPYGPRVRIA-KVLTDMPLIPDSDLDFCRAVVRFCETCERCAQM
Thor\_MP9T 293 AGLGQYGRHG-LLISKPYGPRVRIA-KVLTDMPLIPDSDLDFCRAVVRFCETCERCAQM
Thor\_Baja 288 AGLGQYGRHG-LLITKEYGPRVRIA-KVLTDMPLIPDSDLDFCRAVVRFCETCERCAQM
Loki\_Baja2 246 AGLGQYGRHG-LLITPEFGPRVRIA-KVFTNMPKSDNPNIKFIEKLLKCYCKNCTKCAEA
Loki\_GC14\_1 236 AGLGALGRIG-LLITPEFGPRVRIA-KVFTDPLPISDEVNKDFIHKVENFCCKRCKCANA
Loki\_GC14\_2 236 GGLGALGRIG-LLITPEFGPRVRIA-KVFTDPLPISDKPNEKFIHKVENFCCKRCKCANA
Loki\_Baja3 231 AGLGALGRIG-LLITKDFGPRVRIA-KVLTDMPLIPDSDLDFCRAVVRFCETCERCAQM
consensus 601 aGlge gR g llitp yGprvria kvltldplvpdkp f gvlefCktC kCad

cluster 1

- Aminoacids binding to chlorinated compounds
Corronoid binding sites
conserved Fe-S cluster binding sites
