# Supplementary material for: Metagenomes from Coastal Marine Sediments Give Insights into the Ecological Role and Cellular Features of Loki- and Thorarchaeota
Source: PubMed Central journal article supplement (PMC6737245; doi:10.1128/mbio.02039-19), 2019-09-10

## A) Lokiarchaeota

### Functional Annotation

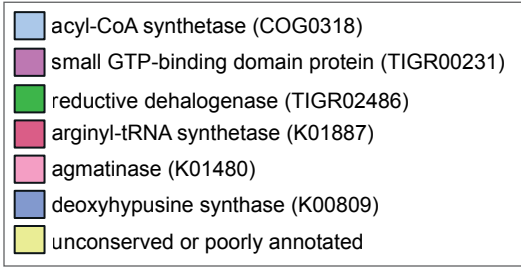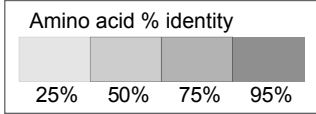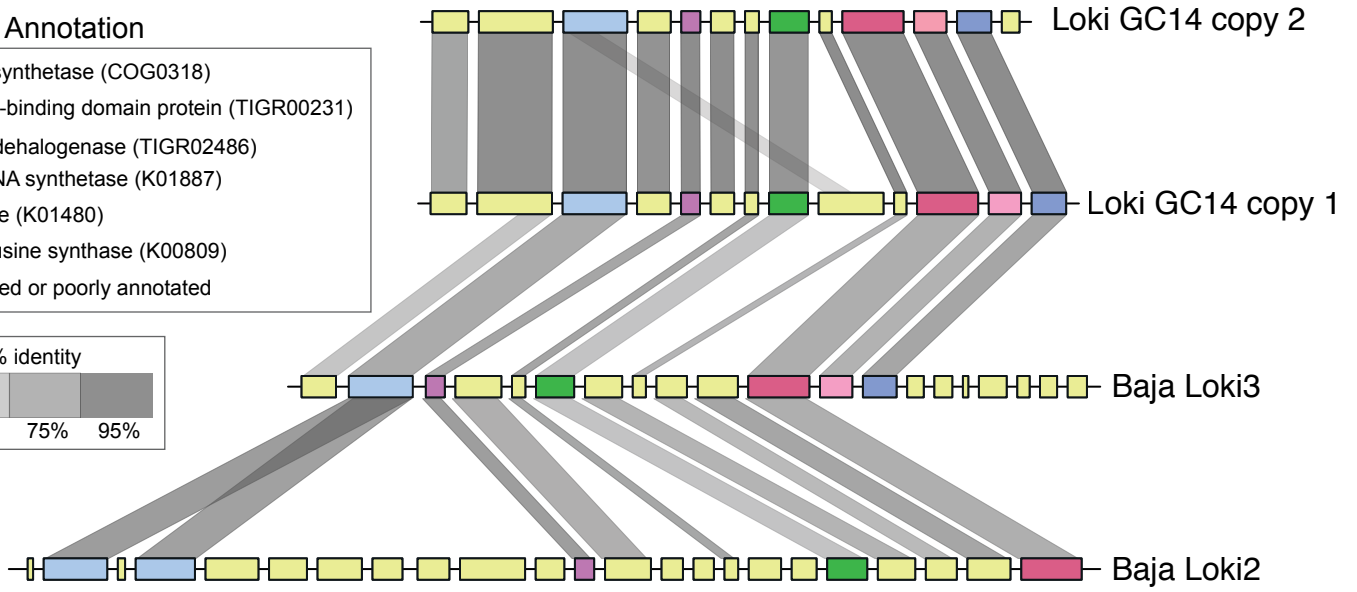

## B) Thorarchaeota

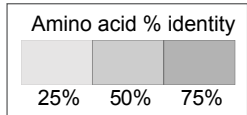

Thor AB

Thor SMTZ1-83

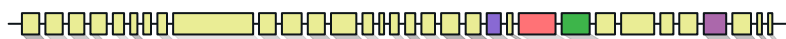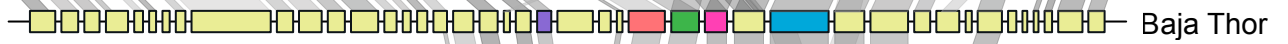

### Functional Annotation

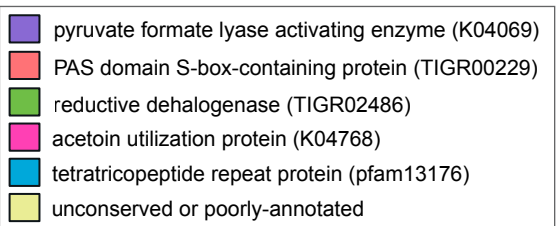

Thor SMTZ1-45

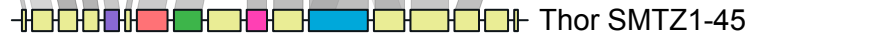

Supplement: mBio.02039-19-sf005.pdf [file mBio.02039-19-sf005.pdf]
