# Supplementary material for: Metagenomes from Coastal Marine Sediments Give Insights into the Ecological Role and Cellular Features of Loki- and Thorarchaeota
Source: PubMed Central journal article supplement (PMC6737245; doi:10.1128/mbio.02039-19), 2019-09-10

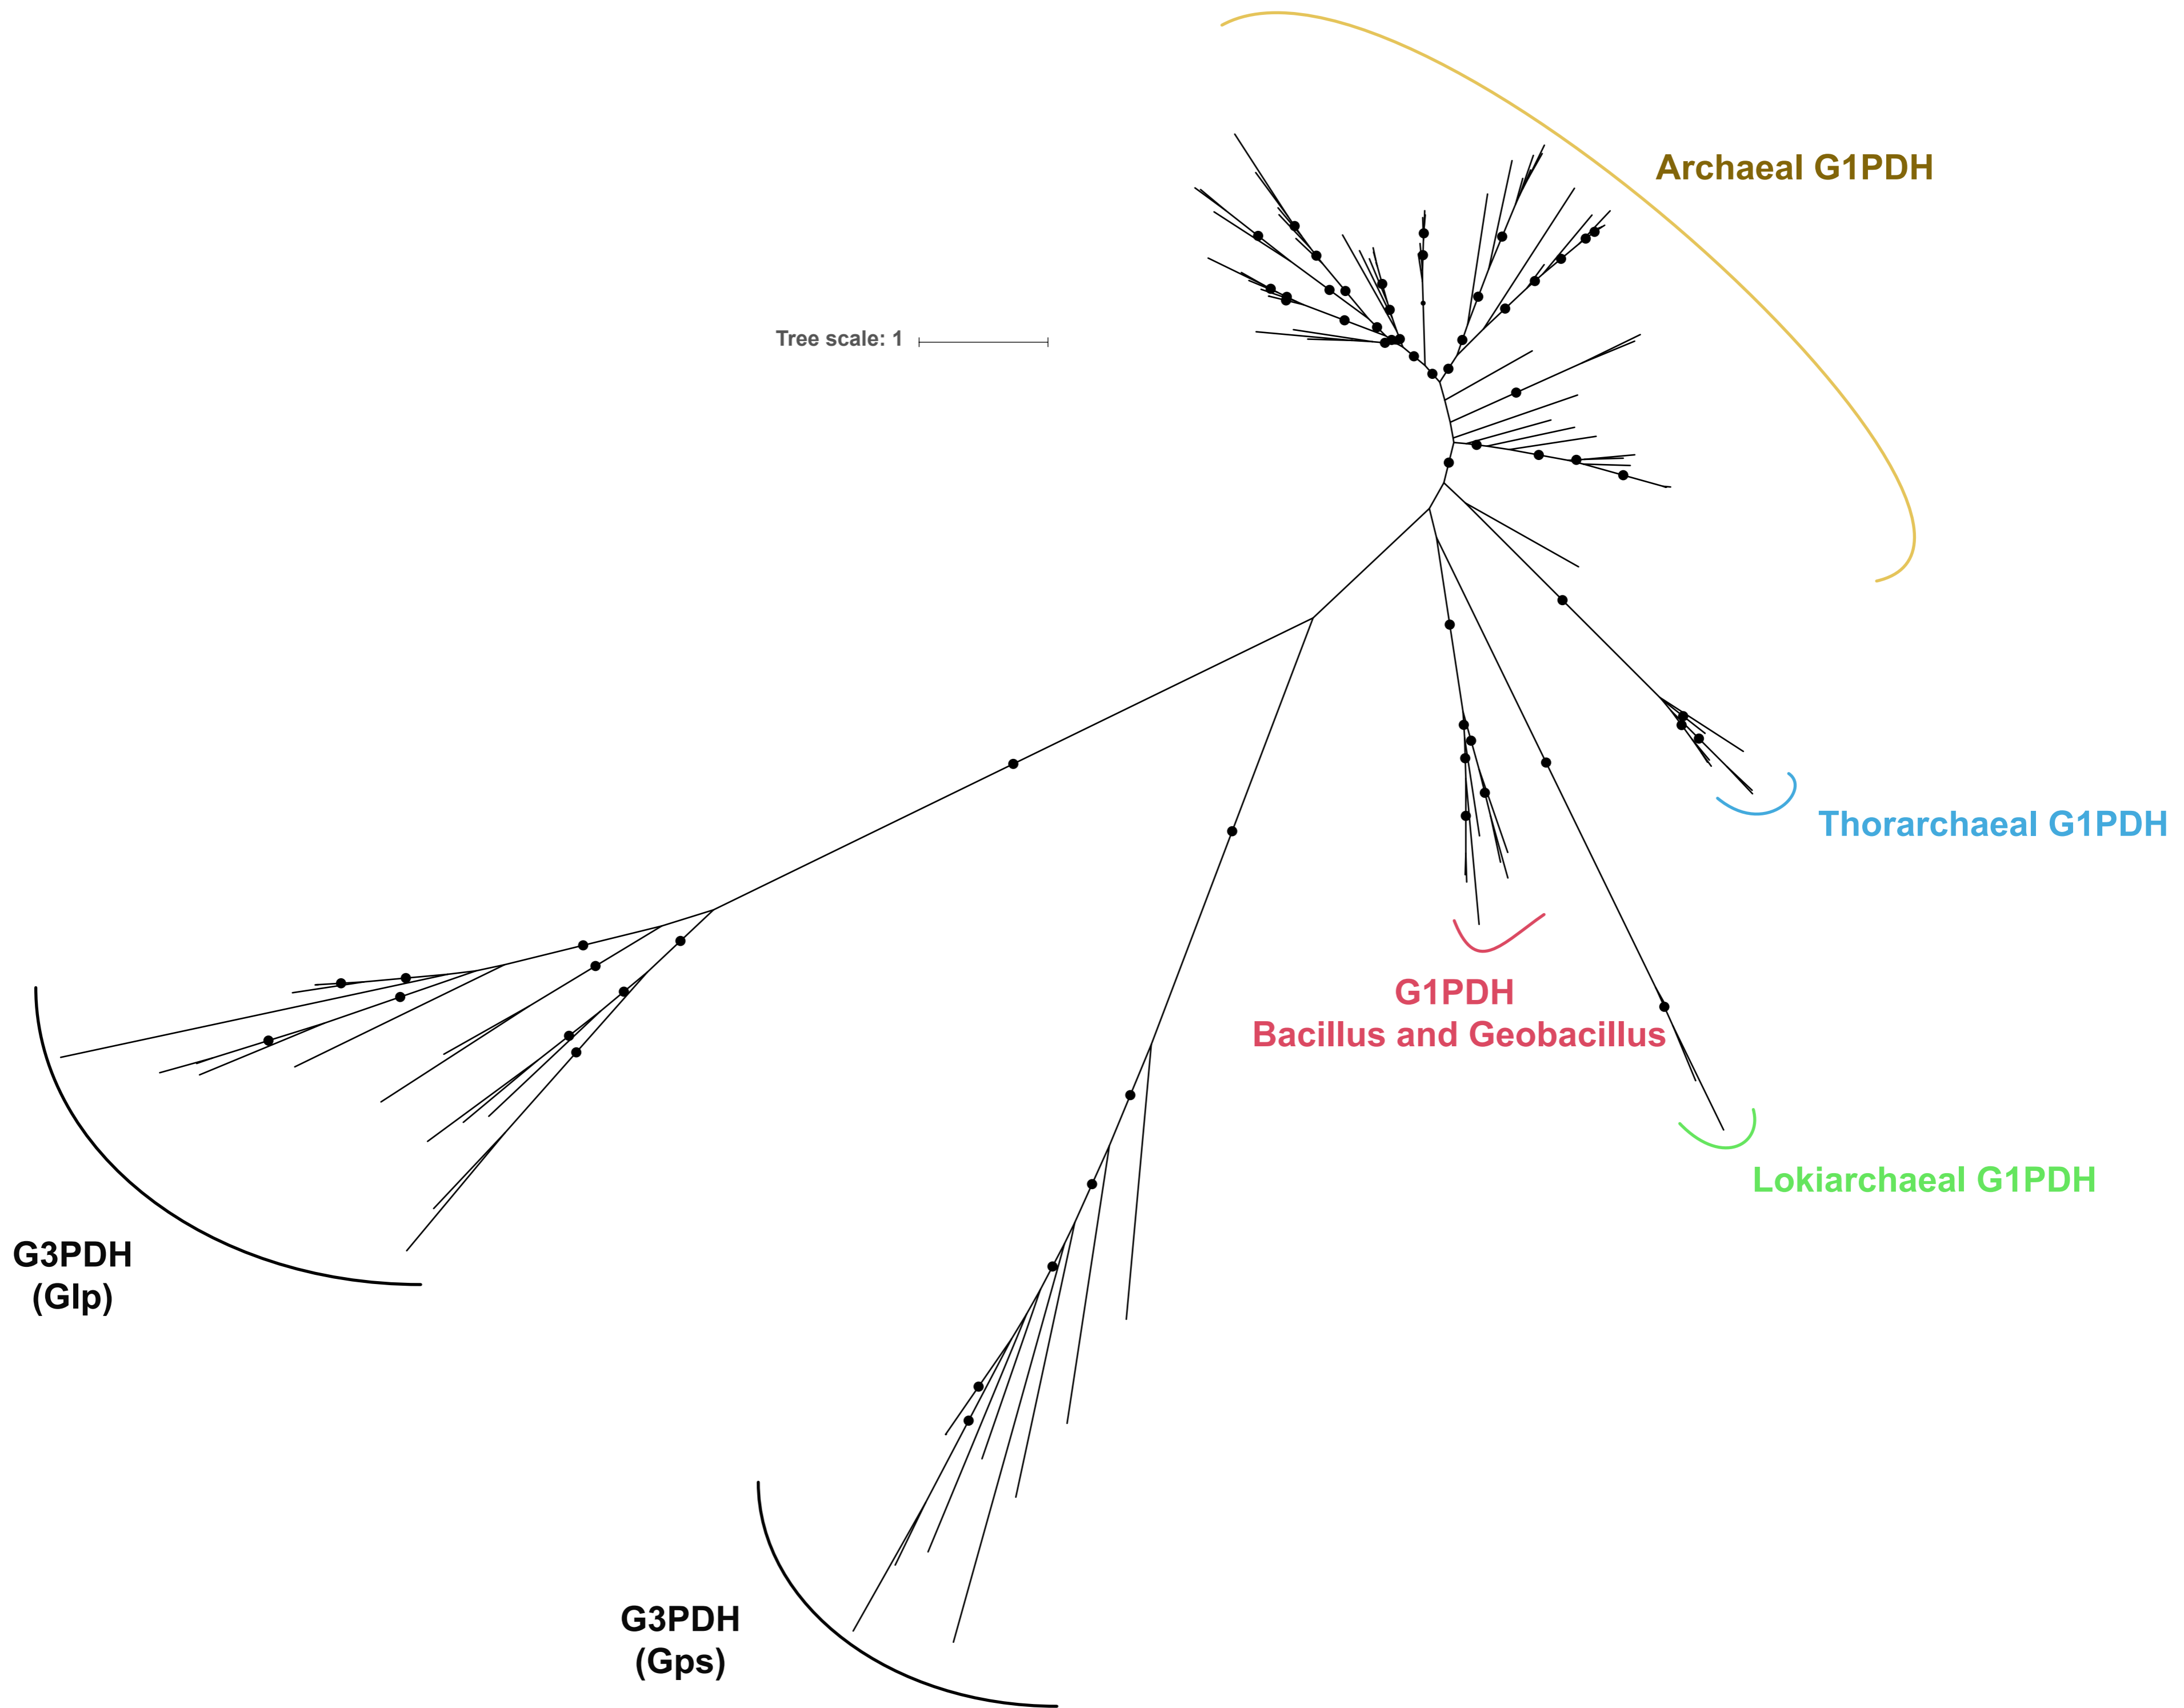

Supplement: mBio.02039-19-sf007.pdf [file mBio.02039-19-sf007.pdf]
